# Supplementary material for: Conceptual structure of the Taiwan Chinese version of the EORTC QLQ-C30
Source: Springer Nature journal article supplement (doi:10.1007/s11136-014-0913-3), 2015-01-05
Supplement: MOESM1 [file 283930]

## Sheet: Supplemental Table 1
	Model I						Model II						Model III						Model IV						Model V						Model VI
	Symptom burden, function and GH*						Health-related quality of life and GH*						Formative symptom burden, function and GH*						Mental health, physical health and GH*						Mental function, physical burden and GH*						Formative health-related quality of life and GH*
	Relationship	Factor loading	Residual	SMC**	Composite		Relationship	Factor loading	Residual	SMC**	Composite		Relationship	Factor loading	Residual	SMC**	Composite		Relationship	Factor loading	Residual	SMC**	Composite		Relationship	Factor loading	Residual	SMC**	Composite		Relationship	Factor loading	Residual	SMC**	Composite
					reliability						reliability						reliability						reliability						reliability						reliability
	fungh	-0.68																	mhgh						mfgh	-0.6
	symgh	-0.7					hr→gh	-0.71	0.49	0.51			sym→gh	0.71	0.49	0.51			phgh						pbgh	-0.7					hr→gh	-0.71	0.15	0.85
	symfun	0.91											sym→fun	-0.95	0.09	0.91			mhph						mfpb	0.77
	fun→pf	0.69	0.52	0.48	0.85		hr→pf	0.66	0.56	0.44	0.83		fun→pf	0.68	0.54	0.46	0.86		mh→rf						mf→rf	-0.2	0.39	0.61	0.74		hr→pf	0.67	0.55	0.45	0.85
	fun→rf	0.77	0.41	0.59			hr→rf	0.75	0.44	0.56			fun→rf	0.74	0.46	0.54			mh→ef						mf→ef	0.87	0.24	0.76			hr→rf	0.73	0.47	0.53
	fun→ef	0.71	0.5	0.5			hr→ef	0.69	0.52	0.48			fun→ef	0.73	0.46	0.54			mh→cf						mf→cf	0.91	0.16	0.84			hr→ef	0.73	0.47	0.54
	fun→cf	0.75	0.43	0.57			hr→cf	0.72	0.48	0.52			fun→cf	0.79	0.38	0.62			mh→sf						mf→sf	0.31	0.48	0.52			hr→cf	0.78	0.38	0.62
	fun→sf	0.74	0.45	0.55			hr→sf	0.71	0.5	0.5			fun→sf	0.75	0.44	0.56			mh→fa												hr→sf	0.74	0.45	0.55
																			mh→pa						pb→rf	0.92	0.39	0.61	0.85
	pf→q1	0.67	0.55	0.45	0.8		pf→q1	0.67	0.55	0.45	0.8		pf→q1	0.67	0.55	0.45	0.8		mh→sl						pb→pf	0.68	0.54	0.46			pf→q1	0.67	0.55	0.45	0.8
	pf→q2	0.82	0.33	0.67			pf→q2	0.82	0.33	0.67			pf→q2	0.82	0.32	0.68			mh→fi						pb→sf	0.45	0.48	0.52			pf→q2	0.82	0.32	0.68
	pf→q3	0.78	0.39	0.61			pf→q3	0.78	0.39	0.61			pf→q3	0.78	0.39	0.61									pb→fa	0.96	0.09	0.91			pf→q3	0.78	0.39	0.61
	pf→q4	0.55	0.7	0.3			pf→q4	0.55	0.7	0.3			pf→q4	0.55	0.7	0.3			ph→rf						pb→nv	0.54	0.71	0.29			pf→q4	0.55	0.7	0.3
	pf→q5	0.5	0.75	0.25			pf→q5	0.5	0.75	0.25			pf→q5	0.5	0.75	0.25			ph→pf						pb→pa	0.71	0.5	0.5			pf→q5	0.5	0.75	0.25
																			ph→sf						pb→dy	0.51	0.74	0.26
	rf→q6	0.89	0.21	0.79	0.9		rf→q6	0.89	0.21	0.79	0.9		rf→q6	0.89	0.21	0.79	0.9		ph→fa						pb→sl	0.48	0.77	0.23			rf→q6	0.89	0.21	0.79	0.9
	rf→q7	0.91	0.17	0.83			rf→q7	0.91	0.17	0.83			rf→q7	0.91	0.17	0.83			ph→nv						pb→ap	0.61	0.63	0.37			rf→q7	0.91	0.17	0.83
																			ph→pa						pb→co	0.2	0.96	0.04
	ef→q21	0.76	0.43	0.57	0.86		ef→q21	0.76	0.43	0.57	0.86		ef→q21	0.75	0.43	0.57	0.86		ph→dy						pb→di	0.25	0.94	0.06			ef→q21	0.75	0.43	0.57	0.86
	ef→q22	0.89	0.2	0.8			ef→q22	0.89	0.2	0.8			ef→q22	0.89	0.21	0.79			ph→sl						pb→fi	0.23	0.95	0.05			ef→q22	0.89	0.21	0.79
	ef→q23	0.62	0.61	0.39			ef→q23	0.63	0.61	0.39			ef→q23	0.62	0.61	0.39			ph→ap												ef→q23	0.62	0.61	0.39
	ef→q24	0.83	0.32	0.68			ef→q24	0.83	0.32	0.68			ef→q24	0.83	0.31	0.69			ph→co						pf→q1	0.67	0.55	0.45	0.8		ef→q24	0.83	0.31	0.69
																			ph→di						pf→q2	0.82	0.33	0.67
	cf→q20	0.73	0.46	0.54	0.56		cf→q20	0.76	0.42	0.58	0.57		cf→q20	0.72	0.49	0.51	0.56		ph→fi						pf→q3	0.78	0.39	0.61			cf→q20	0.72	0.48	0.52	0.56
	cf→q25	0.51	0.74	0.26			cf→q25	0.49	0.76	0.24			cf→q25	0.52	0.73	0.27									pf→q4	0.55	0.69	0.31			cf→q25	0.52	0.73	0.27
																			pf→q1						pf→q5	0.5	0.75	0.25
	sf→q26	0.86	0.26	0.74	0.85		sf→q26	0.86	0.27	0.73	0.85		sf→q26	0.86	0.26	0.74	0.85		pf→q2												sf→q26	0.86	0.26	0.74	0.85
	sf→q27	0.86	0.27	0.73			sf→q27	0.86	0.26	0.74			sf→q27	0.86	0.27	0.73			pf→q3						rf→q6	0.89	0.21	0.79	0.89		sf→q27	0.86	0.27	0.73
																			pf→q4						rf→q7	0.91	0.18	0.82
	gh→q29	0.88	0.22	0.78	0.85		gh→q29	0.88	0.23	0.77	0.84		gh→q29	0.87	0.24	0.76	0.84		pf→q5												gh→q29	0.86	0.25	0.75	0.85
	gh→q30	0.83	0.31	0.69			gh→q30	0.83	0.31	0.69			gh→q30	0.84	0.3	0.7									ef→q21	0.76	0.42	0.58	0.86		gh→q30	0.85	0.28	0.72
																			rf→q6						ef→q22	0.88	0.22	0.78
	sym→fa	0.97	0.05	0.95			hr→fa	0.95	0.1	0.9			fa→sym	-0.49	0.07	0.93			rf→q7						ef→q23	0.62	0.61	0.39			fa→hr	0.59	0.15	0.85
	sym→nv	0.55	0.7	0.3			hqrol→nv	0.53	0.72	0.28			nv→sym	-0.11	0.07	0.93									ef→q24	0.84	0.3	0.7			nv→hr	-0.01	0.15	0.85
	sym→pa	0.72	0.48	0.52			hr→pa	0.71	0.49	0.51			pa→sym	-0.03	0.07	0.93			ef→q21												pa→hr	0.09	0.15	0.85
	sym→dy	0.5	0.75	0.25			hr→dy	0.5	0.75	0.25			dy→sym	-0.23	0.07	0.93			ef→q22						cf→q20	0.67	0.56	0.44	0.55		dy→hr	0.14	0.15	0.85
	sym→sl	0.5	0.75	0.25			hr→sl	0.5	0.75	0.25			sl→sym	-0.24	0.07	0.93			ef→q23						cf→q25	0.56	0.68	0.32			sl→hr	0.1	0.15	0.85
	sym→ap	0.62	0.61	0.39			hr→ap	0.6	0.63	0.37			ap→sym	0.01	0.07	0.93			ef→q24												ap→hr	0.07	0.15	0.85
	sym→co	0.21	0.95	0.05			hr→co	0.24	0.94	0.06			co→sym	-0.02	0.07	0.93									sf→q26	0.86	0.25	0.75	0.85		co→hr	0.05	0.15	0.85
	sym→di	0.25	0.94	0.06			hr→di	0.24	0.94	0.06			di→sym	0	0.07	0.93			cf→q20						sf→q27	0.86	0.27	0.73			di→hr	0.02	0.15	0.85
	sym→fi	0.28	0.92	0.08			hr→fi	0.24	0.94	0.06			fi→sym	-0.18	0.07	0.93			cf→q25												fi→hr	0.17	0.15	0.85
																									gh→q29	0.87	0.24	0.76	0.84
	fa→q10	0.64	0.59	0.41	0.79		fa→q10	0.65	0.58	0.42	0.79		fa→q10	0.64	0.59	0.41	0.79		sf→q26						gh→q30	0.84	0.3	0.7			fa→q10	0.64	0.58	0.42	0.79
	fa→q12	0.83	0.31	0.69			fa→q12	0.82	0.32	0.68			fa→q12	0.84	0.3	0.7			sf→q27												fa→q12	0.84	0.3	0.7
	fa→q18	0.76	0.42	0.58			fa→q18	0.76	0.42	0.58			fa→q18	0.75	0.43	0.57									fa→q10	0.65	0.57	0.43	0.79		fa→q18	0.75	0.43	0.57
																			gh→q29						fa→q12	0.82	0.33	0.67
	nv→q14	0.92	0.15	0.85	0.86		nv→q14	0.92	0.15	0.85	0.85		nv→q14	0.96	0.08	0.92	0.86		gh→q30						fa→q18	0.77	0.41	0.59			nv→q14	0.96	0.08	0.92	0.86
	nv→q15	0.8	0.35	0.65			nv→q15	0.8	0.36	0.64			nv→q15	0.77	0.41	0.59															nv→q15	0.77	0.41	0.59
																			fa→q10						nv→q14	0.92	0.15	0.85	0.85
	pa→q9	0.72	0.49	0.51	0.78		pa→q9	0.7	0.5	0.5	0.79		pa→q9	0.72	0.48	0.52	0.78		fa→q12						nv→q15	0.8	0.36	0.64			pa→q9	0.72	0.48	0.52	0.78
	pa→q19	0.88	0.22	0.78			pa→q19	0.9	0.2	0.8			pa→q19	0.87	0.24	0.76			fa→q18												pa→q19	0.87	0.24	0.76
																									pa→q9	0.71	0.5	0.5	0.79
	*GH: global health/quality of life																		nv→q14						pa→q19	0.89	0.2	0.8
	**SMC: square multiple correlation																		nv→q15
	first-order latent variables (gh: global health/quality-of-life status, pf: physical function, rf: role function, ef: emotional function, sf: social function, pa: pain, nv: nausea/vomiting, fa: fatigue, dy: dyspnea, sl: insomnia, ap: appetite loss, co: constipation, di: diarrhea, fi: financial difficulty, mi: memory impairment, ci: concentration impairment).
	Secondary-order latent variables (hr: health-related quality of life, sym: symptom burden, fun: function, mh: mental health, ph: physical health, mf: mental function, pb: physical burden).																		pa→q9
																			pa→q19

## Sheet: Supplemental Table 2
	Model I						Model II						Model III						Model IV						Model V						Model VI
	Symptom burden, function and GH*						Health-related quality of life and GH*						Formative symptom burden, function and GH*						Mental health, physical health and GH*						Mental function, physical burden and GH*						Formative health-related quality of life and GH*
	Relationship	Factor loading	Residual	SMC**	Composite		Relationship	Factor loading	Residual	SMC**	Composite		Relationship	Factor loading	Residual	SMC**	Composite		Relationship	Factor loading	Residual	SMC**	Composite		Relationship	Factor loading	Residual	SMC**	Composite		Relationship	Factor loading	Residual	SMC**	Composite
					reliability						reliability						reliability						reliability						reliability						reliability
	fungh	-0.66																	mhgh	-0.61					mfgh	-0.6
	symgh	-0.71					hr→gh	-0.71	0.49	0.51			sym→gh	0.71	0.5	0.5			phgh	-0.67					pbgh	-0.7					hr→gh	-0.71	0.5	0.5
	symfun	0.92											sym→fun	-0.94	0.12	0.88			mhph	0.64					mfpb	0.77
	fun→pf	0.7	0.5	0.5	0.82		hr→pf	0.66	0.56	0.44	0.8		fun→pf	0.7	0.51	0.49	0.82		mh→rf	-0.05	0.34	0.66	0.79		mf→rf	-0.2	0.39	0.61	0.65		hr→pf	0.69	0.53	0.47	0.81
	fun→rf	0.78	0.39	0.61			hr→rf	0.74	0.45	0.55			fun→rf	0.76	0.42	0.58			mh→ef	0.84	0.3	0.7			mf→ef	0.86	0.26	0.74			hr→rf	0.75	0.44	0.56
	fun→ef	0.69	0.52	0.48			hr→ef	0.7	0.51	0.49			fun→ef	0.71	0.49	0.51			mh→cf1	0.64	0.59	0.41			mf→cf1	0.63	0.6	0.4			hr→ef	0.72	0.48	0.52
	fun→sf	0.75	0.44	0.56			hr→sf	0.71	0.5	0.5			fun→sf	0.75	0.44	0.56			mh→cf2	0.54	0.71	0.29			mf→cf2	0.53	0.72	0.28			hr→sf	0.73	0.46	0.54
																			mh→sf	0.47	0.47	0.53			mf→sf	0.3	0.48	0.52
	pf→q1	0.67	0.55	0.45	0.8		pf→q1	0.67	0.55	0.45	0.8		pf→q1	0.67	0.55	0.45	0.8		mh→fa	0.25	0.11	0.89									pf→q1	0.67	0.55	0.45	0.8
	pf→q2	0.82	0.33	0.67			pf→q2	0.82	0.33	0.67			pf→q2	0.82	0.33	0.67			mh→pa	0.38	0.5	0.5			pb→rf	0.93	0.39	0.61	0.85		pf→q2	0.82	0.33	0.67
	pf→q3	0.78	0.39	0.61			pf→q3	0.78	0.39	0.61			pf→q3	0.78	0.39	0.61			mh→sl	0.53	0.68	0.32			pb→pf	0.68	0.54	0.46			pf→q3	0.78	0.39	0.61
	pf→q4	0.55	0.7	0.3			pf→q4	0.55	0.7	0.3			pf→q4	0.55	0.7	0.3			mh→fi	0.52	0.82	0.18			pb→sf	0.46	0.48	0.52			pf→q4	0.55	0.7	0.3
	pf→q5	0.5	0.75	0.25			pf→q5	0.5	0.75	0.25			pf→q5	0.5	0.75	0.25									pb→fa	0.95	0.09	0.91			pf→q5	0.5	0.75	0.25
																			ph→rf	0.84	0.34	0.66	0.78		pb→nv	0.54	0.71	0.29
	rf→q6	0.89	0.21	0.79	0.9		rf→q6	0.89	0.21	0.79	0.9		rf→q6	0.89	0.21	0.79	0.9		ph→pf	0.7	0.51	0.49			pb→pa	0.71	0.5	0.5			rf→q6	0.89	0.21	0.79	0.89
	rf→q7	0.91	0.17	0.83			rf→q7	0.91	0.17	0.83			rf→q7	0.91	0.17	0.83			ph→sf	0.33	0.47	0.53			pb→dy	0.51	0.74	0.26			rf→q7	0.91	0.18	0.82
																			ph→fa	0.77	0.11	0.89			pb→sl	0.48	0.77	0.23
	ef→q21	0.76	0.43	0.57	0.86		ef→q21	0.76	0.43	0.57	0.86		ef→q21	0.76	0.43	0.57	0.86		ph→nv	0.57	0.67	0.33			pb→ap	0.61	0.63	0.37			ef→q21	0.76	0.43	0.57	0.86
	ef→q22	0.9	0.19	0.81			ef→q22	0.89	0.2	0.8			ef→q22	0.89	0.2	0.8			ph→pa	0.4	0.5	0.5			pb→co	0.2	0.96	0.04			ef→q22	0.89	0.21	0.79
	ef→q23	0.62	0.61	0.39			ef→q23	0.63	0.61	0.39			ef→q23	0.62	0.61	0.39			ph→dy	0.52	0.73	0.27			pb→di	0.25	0.94	0.06			ef→q23	0.62	0.61	0.39
	ef→q24	0.82	0.32	0.68			ef→q24	0.83	0.32	0.68			ef→q24	0.83	0.32	0.68			ph→sl	0.06	0.68	0.32			pb→fi	0.22	0.95	0.05			ef→q24	0.83	0.31	0.69
																			ph→ap	0.66	0.56	0.44
	sf→q26	0.86	0.26	0.74	0.85		sf→q26	0.86	0.26	0.74	0.85		sf→q26	0.86	0.26	0.74	0.85		ph→co	0.17	0.97	0.03			pf→q1	0.67	0.55	0.45	0.8		sf→q26	0.86	0.26	0.74	0.85
	sf→q27	0.86	0.26	0.74			sf→q27	0.86	0.26	0.74			sf→q27	0.86	0.26	0.74			ph→di	0.26	0.93	0.07			pf→q2	0.82	0.33	0.67			sf→q27	0.86	0.26	0.74
																			ph→fi	-0.2	0.82	0.18			pf→q3	0.78	0.39	0.61
	gh→q29	0.88	0.22	0.78	0.84		gh→q29	0.88	0.23	0.77	0.84		gh→q29	0.87	0.24	0.76	0.84								pf→q4	0.55	0.69	0.31			gh→q29	0.86	0.26	0.74	0.84
	gh→q30	0.83	0.32	0.68			gh→q30	0.83	0.31	0.69			gh→q30	0.84	0.3	0.7			pf→q1	0.67	0.56	0.45	0.8		pf→q5	0.5	0.75	0.25			gh→q30	0.85	0.28	0.72
																			pf→q2	0.82	0.33	0.67
	sym→fa	0.96	0.09	0.91			hr→fa	0.94	0.11	0.89			fa→sym	-0.39	0.05	0.95			pf→q3	0.79	0.38	0.62			rf→q6	0.89	0.21	0.79	0.89		fa→hr	0.71	0.12	0.88
	sym→nv	0.54	0.71	0.29			hqrol→nv	0.52	0.73	0.27			nv→sym	0.03	0.05	0.95			pf→q4	0.55	0.69	0.31			rf→q7	0.91	0.18	0.82			nv→hr	0.09	0.12	0.88
	sym→pa	0.73	0.47	0.53			hr→pa	0.71	0.49	0.51			pa→sym	-0.04	0.05	0.95			pf→q5	0.5	0.75	0.25									pa→hr	0.02	0.12	0.88
	sym→dy	0.53	0.72	0.28			hr→dy	0.5	0.75	0.25			dy→sym	-0.24	0.05	0.95									ef→q21	0.76	0.42	0.58	0.86		dy→hr	0.14	0.12	0.88
	sym→sl	0.51	0.74	0.26			hr→sl	0.51	0.74	0.26			sl→sym	-0.11	0.05	0.95			rf→q6	0.89	0.21	0.79	0.89		ef→q22	0.88	0.22	0.78			sl→hr	-0.01	0.12	0.88
	sym→ap	0.61	0.63	0.37			hr→ap	0.6	0.64	0.36			ap→sym	-0.19	0.05	0.95			rf→q7	0.91	0.18	0.82			ef→q23	0.62	0.61	0.39			ap→hr	-0.06	0.12	0.88
	sym→co	0.21	0.95	0.05			hr→co	0.22	0.95	0.05			co→sym	0	0.05	0.95									ef→q24	0.84	0.3	0.7			co→hr	0.01	0.12	0.88
	sym→di	0.24	0.94	0.06			hr→di	0.24	0.94	0.06			di→sym	-0.1	0.05	0.95			ef→q21	0.76	0.42	0.58	0.86								di→hr	0.04	0.12	0.88
	sym→fi	0.24	0.94	0.06			hr→fi	0.25	0.94	0.06			fi→sym	-0.15	0.05	0.95			ef→q22	0.88	0.22	0.78			cf1→q20	1	0.03	0.97			fi→hr	0.08	0.12	0.88
	sym→cf1	0.58	0.67	0.33			hr→cf1	0.56	0.68	0.32			cf1→sym	-0.02	0.05	0.95			ef→q23	0.63	0.61	0.39			cf2→q25	1	0	1			cf1→hr	0.03	0.12	0.88
	sym→cf2	0.36	0.87	0.13			hr→cf2	0.37	0.86	0.14			cf2→sym	-0.14	0.05	0.95			ef→q24	0.83	0.31	0.69									cf2→hr	0.17	0.12	0.88
																									sf→q26	0.86	0.25	0.75	0.85
	fa→q10	0.64	0.58	0.42	0.79		fa→q10	0.65	0.58	0.42	0.79		fa→q10	0.64	0.59	0.41			cf1→q20	0.97	0.05	0.95			sf→q27	0.86	0.27	0.73			fa→q10	0.64	0.59	0.41	0.79
	fa→q12	0.83	0.31	0.69			fa→q12	0.82	0.32	0.68			fa→q12	0.84	0.3	0.7			cf2→q25	1	0	1									fa→q12	0.83	0.31	0.69
	fa→q18	0.76	0.42	0.58			fa→q18	0.76	0.42	0.58			fa→q18	0.76	0.43	0.57									gh→q29	0.87	0.24	0.76	0.84		fa→q18	0.76	0.43	0.57
																			sf→q26	0.87	0.25	0.75	0.85		gh→q30	0.84	0.3	0.7
	nv→q14	0.92	0.15	0.85	0.85		nv→q14	0.92	0.15	0.85	0.85		nv→q14	0.96	0.08	0.92			sf→q27	0.85	0.27	0.73									nv→q14	0.96	0.08	0.92	0.86
	nv→q15	0.8	0.36	0.64			nv→q15	0.8	0.36	0.64			nv→q15	0.77	0.4	0.6									fa→q10	0.65	0.57	0.43	0.79		nv→q15	0.77	0.4	0.6
																			gh→q29	0.87	0.24	0.76	0.84		fa→q12	0.82	0.33	0.67
	pa→q9	0.71	0.5	0.5	0.78		pa→q9	0.7	0.5	0.5	0.79		pa→q9	0.72	0.48	0.52			gh→q30	0.84	0.3	0.7			fa→q18	0.77	0.41	0.59			pa→q9	0.72	0.48	0.52	0.78
	pa→q19	0.89	0.21	0.79			pa→q19	0.9	0.19	0.81			pa→q19	0.87	0.23	0.77															pa→q19	0.87	0.24	0.76
																			fa→q10	0.65	0.58	0.43	0.79		nv→q14	0.92	0.15	0.85	0.85
	*GH: global health/quality of life																		fa→q12	0.82	0.33	0.67			nv→q15	0.8	0.36	0.64
	**SMC: square multiple correlation																		fa→q18	0.77	0.41	0.59
	first-order latent variables (gh: global health/quality-of-life status, pf: physical function, rf: role function, ef: emotional function, sf: social function, pa: pain, nv: nausea/vomiting, fa: fatigue, dy: dyspnea, sl: insomnia, ap: appetite loss, co: constipation, di: diarrhea, fi: financial difficulty, mi: memory impairment, ci: concentration impairment).																								pa→q9	0.71	0.5	0.5	0.79
	Secondary-order latent variables (hr: health-related quality of life, sym: symptom burden, fun: function).																		nv→q14	0.92	0.15	0.85	0.85		pa→q19	0.89	0.2	0.8
																			nv→q15	0.8	0.36	0.64
																			pa→q9	0.7	0.51	0.49	0.79
																			pa→q19	0.9	0.19	0.81
